# Supplementary material for: Hypoxia and Temperature Regulated Morphogenesis in Candida albicans
Source: PLOS journal article supplement (doi:10.1371/journal.pgen.1005447), 2015-08-14
Supplement: S2 (10.1371/journal.pgen.1005447.s002) [file journal.pgen.1005447.s002]

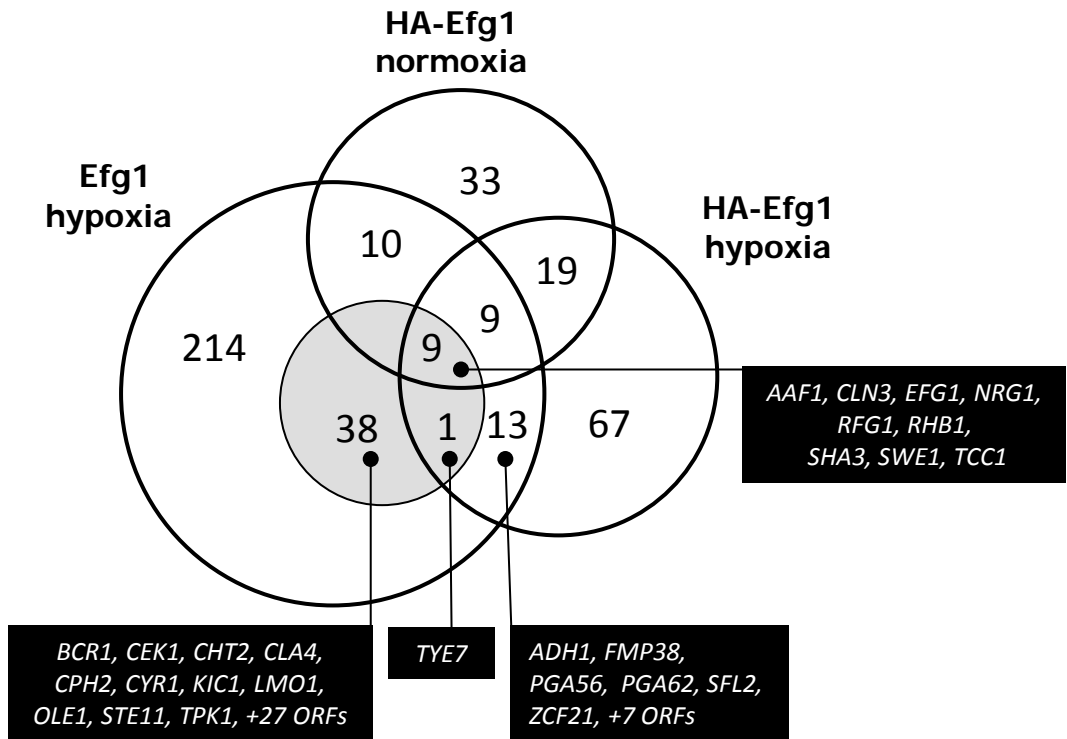

**S2 Fig. Intersection of genomic binding sites for Efg1 and HA-Efg1 under hypoxia and normoxia.** For Efg1, genomic binding sites were derived from ChIP chip experiments comparing strains CAF2-1 (*EFG1/EFG1*) and HLC52 (*efg1/efg1*); for HA-Efg1, strains HLCEEFG1 (*efg1/efg1* [*HA-EFG1*]) and CAF2-1 were compared. Normoxic binding sites for HA-Efg1 were obtained from Lassak *et al.* [40]. The shaded circle encompasses genes in filamentous growth.
