# Supplementary material for: Hypoxia and Temperature Regulated Morphogenesis in Candida albicans
Source: PLOS journal article supplement (doi:10.1371/journal.pgen.1005447), 2015-08-14
Supplement: S4 (10.1371/journal.pgen.1005447.s004) [file journal.pgen.1005447.s004]

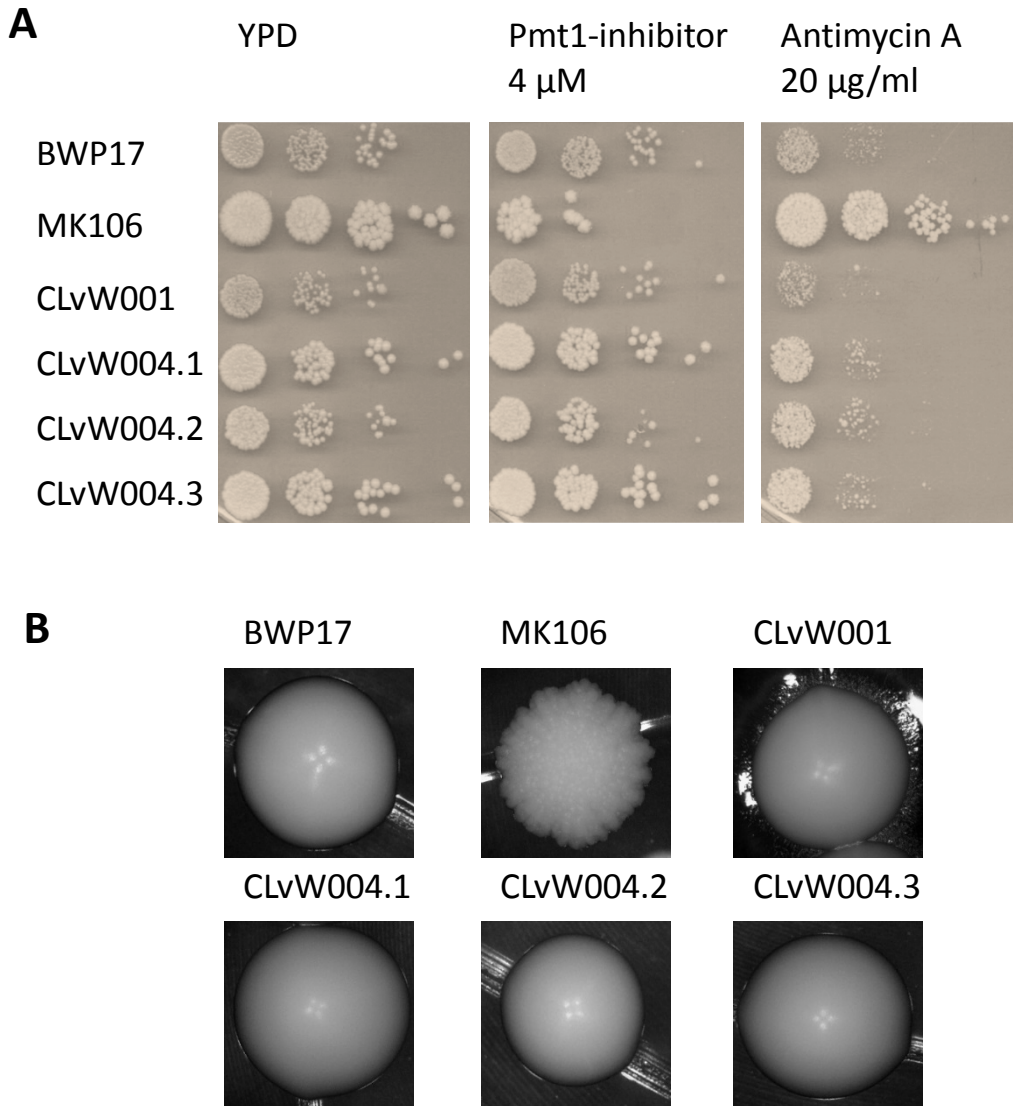

**S4 Fig. Functionality of the HA tagged Ace2 protein.** To verify the functionality of C-terminal HA-tagged Ace2 the phenotypes of three isolates of strain CLvW004 (*ACE2-HA/ace2*) was compared to mutant strain MK106 (*ace2/ace2*), wild-type strain BWP17 (*ACE2/ACE2*) and the heterozygous strain CLvW001 (*ACE2/ace2*). (A) Drop dilution assay for sensitivity to 4  $\mu$ M Pmt1-inhibitor and resistance to antimycin A (20  $\mu$ g/ml). The agar plates were photographed after 2 d incubation at 30 °C. The *ace2* mutant strain Mk106 shows enhanced sensitivity to the Pmt1-inhibitor [49] and is less susceptible to the respiratory inhibitor antimycin A [30]. (B) Colonies of the indicated strains were photographed following growth for 2 d at 30 °C on YPD agar. The *ace2* mutant strain Mk106 shows the wrinkled colony phenotype described previously [27]. Phenotypes of strains CLvW004.1-3 correspond to the heterozygous strain CLvW001 indicating that the Ace2-HA protein is functional.
